# Supplementary material
Source: publisher figshare collection journal article supplement (https://tandf.figshare.com/articles/dataset/_/1427411)
Supplement: Supplementary file 1 [file 3]

ONLINE SUPPLEMENTARY INFORMATION

Complete description of the skull and mandible of the giant mustelid *Eomellivora piveteaui* Ozansoy, 1965 (Mammalia, Carnivora, Mustelidae) from Batallones (MN10), Late Miocene (Madrid, Spain)

ALBERTO VALENCIANO, JUAN ABELLA, OSCAR SANISIDRO, ADAM HARTSTONE-ROSE, MARÍA ÁNGELES ÁLVAREZ-SIERRA, and JORGE MORALES

**‘JOURNAL OF VERTEBRATE PALEONTOLOGY’**

**FIGURE 1S.** Digital rendering of the skull and mandibles Bat-3'09.1000 of *Eomellivora piveteaui* from Batallones without deformation forces on the saggital and coronal planes.
